# Supplementary material
Source: Springer Nature journal article supplement (https://www.springermedizin.de/resource/supplementary/12885_2013_4262_MOESM8_ESM.pdf/9466544)

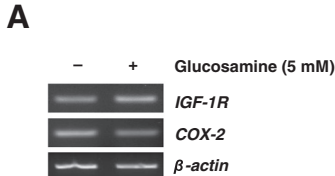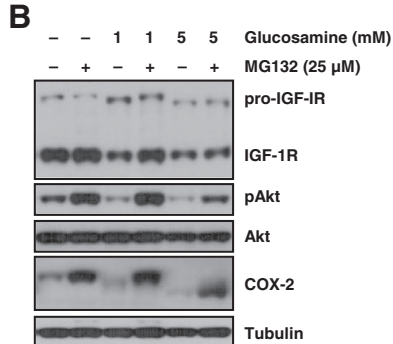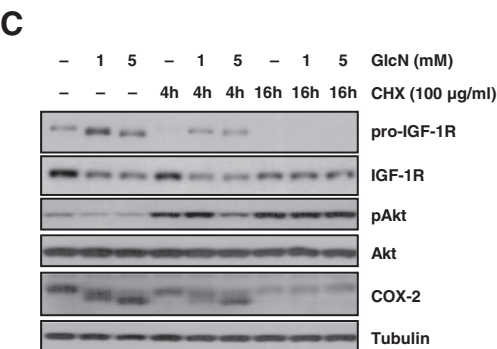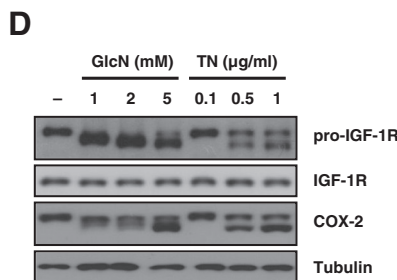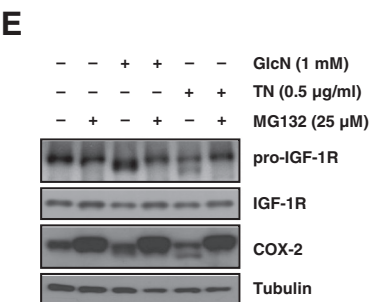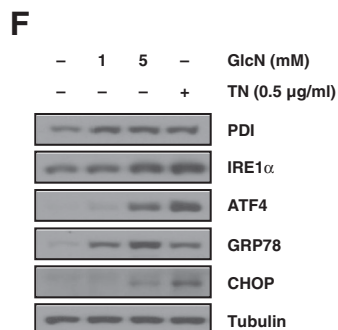

Supplement: MOESM8 [file 9466544]
